# Supplementary material for: Profile hidden Markov model sequence analysis can help remove putative pseudogenes from DNA barcoding and metabarcoding datasets
Source: PubMed Central journal article supplement (PMC8136176; doi:10.1186/s12859-021-04180-x), 2021-05-19
Supplement: 12859_2021_4180_MOESM1_ESM.pdf [file 12859_2021_4180_MOESM1_ESM.pdf]

**Profile hidden Markov model sequence analysis can help remove putative  
pseudogenes from DNA barcoding and metabarcoding datasets**

Porter, T. M., Hajibabaei, M.

**Supplementary Material**

**Table S1. Primers used in the freshwater benthos COI metabarcode dataset used in Part C (Hajibabaei et al., 2019 PLoS ONE).**

| Amplicon | Primer    | Target                                | Primer sequence (5'-3')        | Reference                                               |
|----------|-----------|---------------------------------------|--------------------------------|---------------------------------------------------------|
| BR5      | B         | Freshwater benthic macroinvertebrates | CCIGAYATRGCITTYCCICG           | (Hajibabaei, Spall, Shokralla, & van Konynenburg, 2012) |
|          | ArR5      | Tropical arthropods                   | GTRATIGCICCGCIARIACIG<br>G     | (Gibson et al., 2014)*                                  |
| F230R    | LCO1490   | Metazoan macroinvertebrates           | GGTCAACAAATCATAAAGAT<br>ATTGG  | (Folmer, Black, Hoeh, Lutz, & Vrijenhoek, 1994)         |
|          | 230_R     | Arthropods                            | CTTATRTRTTTATICGIGGR<br>AAIGC  | (Gibson et al., 2015)                                   |
| ml-jg    | mlCOLintF | Metazoa                               | GGWACWGGWTGAACWGT<br>WTAYCCYCC | (Leray et al., 2013)                                    |
|          | jgHCO2198 | Marine invertebrates                  | TAIACYTCIGGRTGICCRAAR<br>AAYCA | (Geller, Meyer, Parker, & Hawk, 2013)                   |
| BF1      | BF1       | Freshwater macroinvertebrates         | ACWGGWTGRACWGTNTAY<br>CC       | (Elbrecht & Leese, 2017)                                |
|          | BR2       | Freshwater macroinvertebrates         | TCDGGRTGNCCRAARAAYC<br>A       | (Elbrecht & Leese, 2017)                                |
| BF2      | BF2       | Freshwater macroinvertebrates         | GCHCCHGAYATRGCHTTYC<br>C       | (Elbrecht & Leese, 2017)                                |
|          | BR2       | Freshwater macroinvertebrates         | TCDGGRTGNCCRAARAAYC<br>A       | (Elbrecht & Leese, 2017)                                |
| fwh1     | fwhF1     | Freshwater macroinvertebrates         | YTCHACWAAYCAYAARGAY<br>ATYGG   | (Vamos, Elbrecht, & Leese, 2017)                        |
|          | fwhR1     | Freshwater macroinvertebrates         | ARTCARTTWCCRAAHCHC<br>C        | (Vamos et al., 2017)                                    |

\* This primer sequence was published based on its alignment to the plus strand but is shown here in the 5'-3' orientation

**Table S2. Description of the datasets analyzed in Part A and Part B.**

| Experiment                                                            | Dataset                                                                                   | Proportion of dataset comprised of nuMTs (%) | Average gene length (bp) | Average nuMT length (bp) | Gene GC content (%) | nuMT GC content (%) |
|-----------------------------------------------------------------------|-------------------------------------------------------------------------------------------|----------------------------------------------|--------------------------|--------------------------|---------------------|---------------------|
| Artificial DNA barcoding dataset. COI genes and nuMTs from 10 species | Full length COI barcodes and nuMT sequences                                               | 19                                           | 659.6                    | 508.1                    | 32.0                | 30.8                |
| Perturbed community dataset                                           | Control full length COI barcodes, no nuMTs                                                | 0                                            | 615                      | NA                       | 31                  | NA                  |
| Perturbed community dataset                                           | Full length COI barcodes, nuMTs introduced through point mutations to decrease GC content | 19                                           | 615                      | 615                      | 31                  | 29                  |
| Perturbed community dataset                                           | Full length COI barcode, nuMTs introduced through frameshift mutations (indels)           | 19                                           | 615                      | 607                      | 31                  | 31                  |
| Perturbed community dataset                                           | Control short COI barcode sequences, no nuMTs                                             | 0                                            | 307** - 308*             | NA                       | 30*-32**            | NA                  |
| Perturbed community dataset                                           | Short COI barcode sequences, nuMTs with decreased GC content                              | 19                                           | 307** - 308*             | 308                      | 30*-32**            | 28-29               |
| Perturbed community dataset                                           | Short COI barcode sequences, nuMTs with indels                                            | 19                                           | 307** - 308*             | 304                      | 30*-32**            | 31-32               |
| Perturbed community dataset                                           | Control full length COI barcode                                                           | 0                                            | 622                      | NA                       | 31                  | NA                  |

|                             |                                                                               |     |     |     |    |    |
|-----------------------------|-------------------------------------------------------------------------------|-----|-----|-----|----|----|
|                             | sequences, no nuMTs                                                           |     |     |     |    |    |
| Perturbed community dataset | Full length COI barcodes, twice the number of nuMTs with decreased GC content | 38  | 622 | 622 | 31 | 28 |
| Perturbed community dataset | Full length COI barcodes, twice the number of nuMTs with indels               | 38  | 622 | 614 | 31 | 32 |
| Perturbed community dataset | Control full length COI barcode sequences, no nuMTs                           | 0   | 622 | NA  | 31 | NA |
| Perturbed community dataset | Full length COI barcodes, half the number of nuMTs with decreased GC content  | 9.5 | 622 | 623 | 31 | 28 |
| Perturbed community dataset | Full length COI barcodes, half the number of nuMTs with indels                | 9.5 | 622 | 615 | 31 | 32 |

\* 5' fragment

\*\* 3' fragment

**Fig S1. COI gene sequences accumulate substitutions in synonymous sites.** For 10 species with annotated COI genes and nuMTs, we did a pairwise comparison of nucleotide substitutions in non-synonymous and synonymous sites: a) COI barcode sequences tend to accumulate substitutions in synonymous sites. In contrast, COI nuMTs tend to accumulate substitutions in non-synonymous sites. After filtering out pairwise comparisons between species with  $< 0.01$  substitutions in synonymous sites (sequences too similar to yield a reliable dN/dS estimate) or  $> 2$  substitutions in synonymous sites (sequences that have accumulated too many substitutions to yield a reliable dN/dS estimate), it was only possible to analyze dN/dS ratios for COI barcode sequences. b) Most pairwise comparisons of COI gene sequences resulted in dN/dS ratios  $< 1$  consistent with purifying selection pressure and the conservation of a protein sequence.

a)

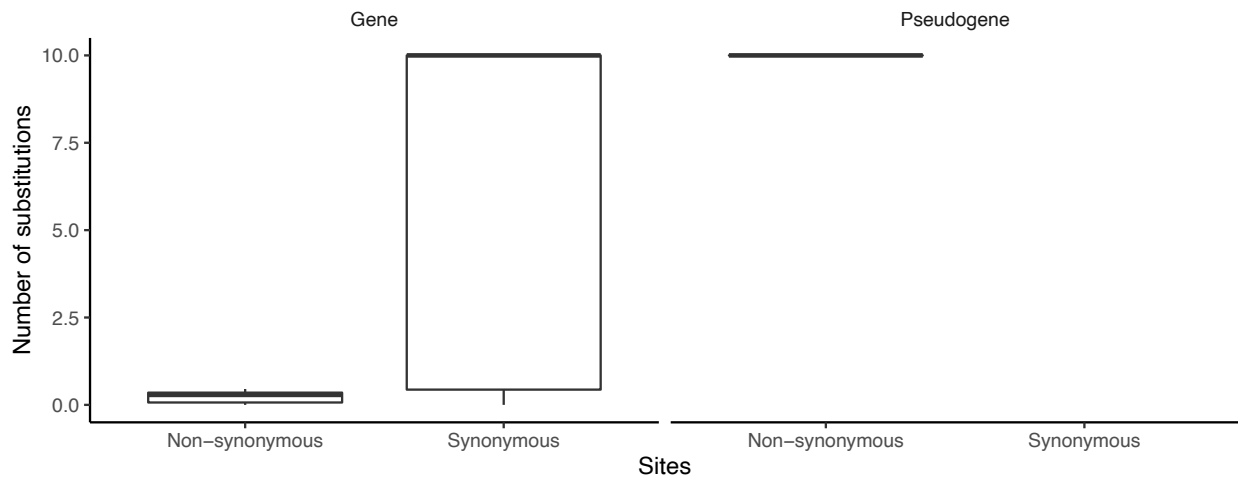

b)

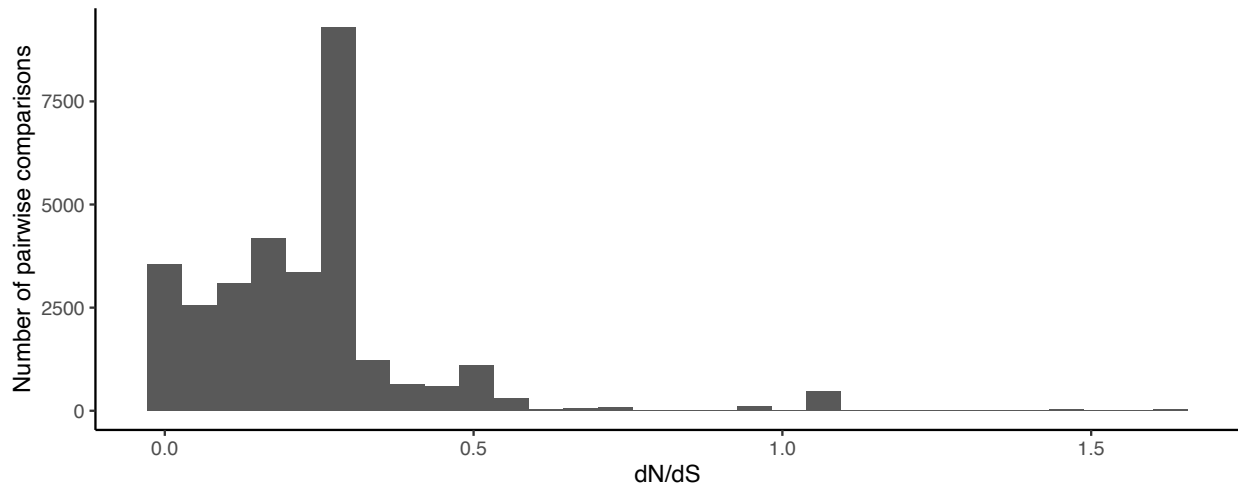

**Fig S2. *Bemisia tabaci* COI pseudogenes cluster together on long branches. A** mid-point rooted neighbor joining phylogram using the Kimura 2-parameter model of nucleotide substitution included gene and known pseudogene sequences. Sequences annotated in GenBank as a nuclear copy of a mitochondrial gene are shown in red. Nodes with greater than 70% bootstrap support are labelled.

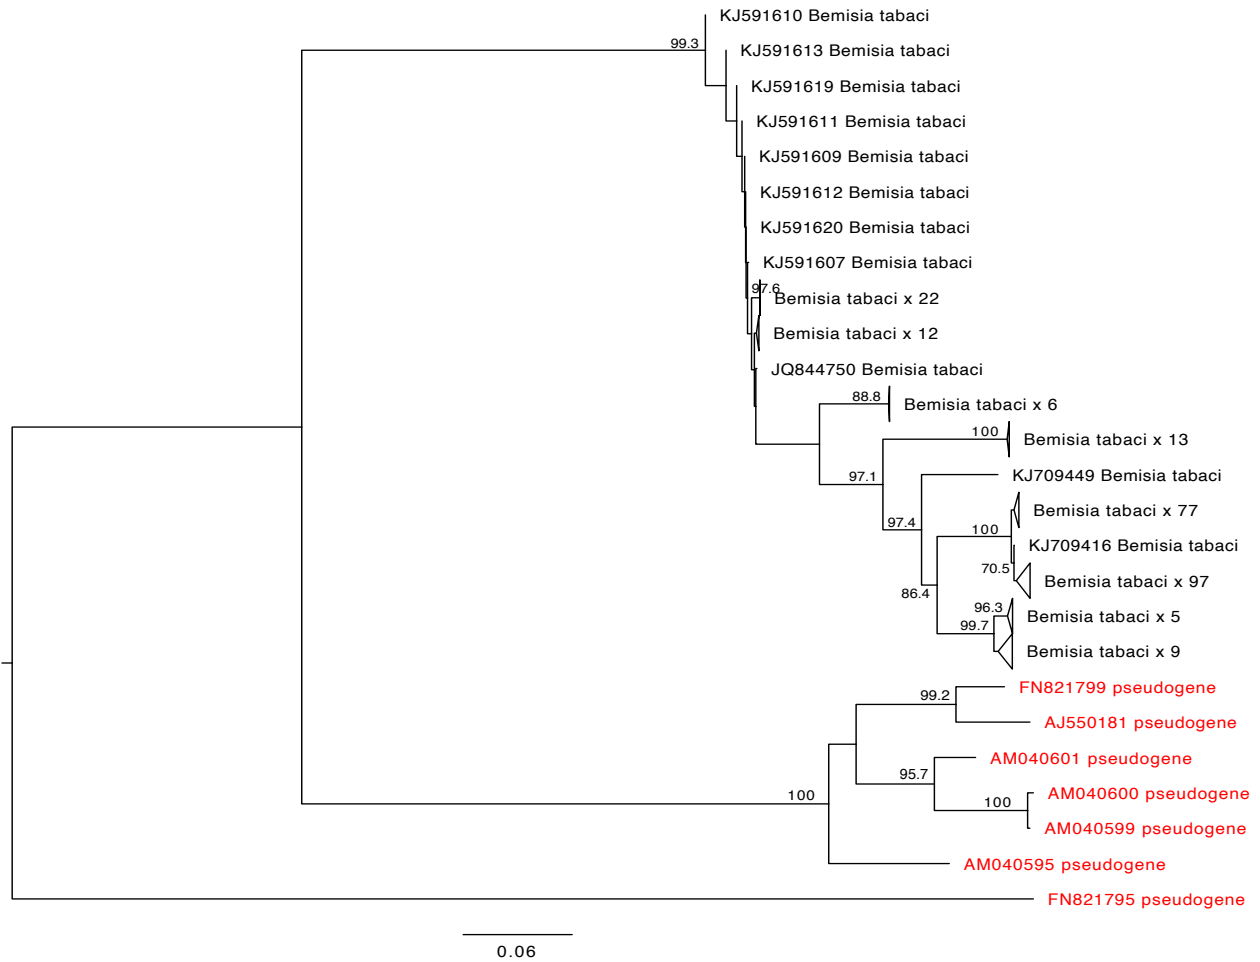

**Fig S3. A single *Xylosandrus germanus* COI pseudogene sequence is found on a long branch.** A mid-point rooted neighbor joining phylogram using the Kimura 2-parameter model of nucleotide substitution included COI gene sequences as well as a sequence annotated in GenBank as a nuclear copy of a mitochondrial gene (red). Nodes with greater than 70% bootstrap support are labelled.

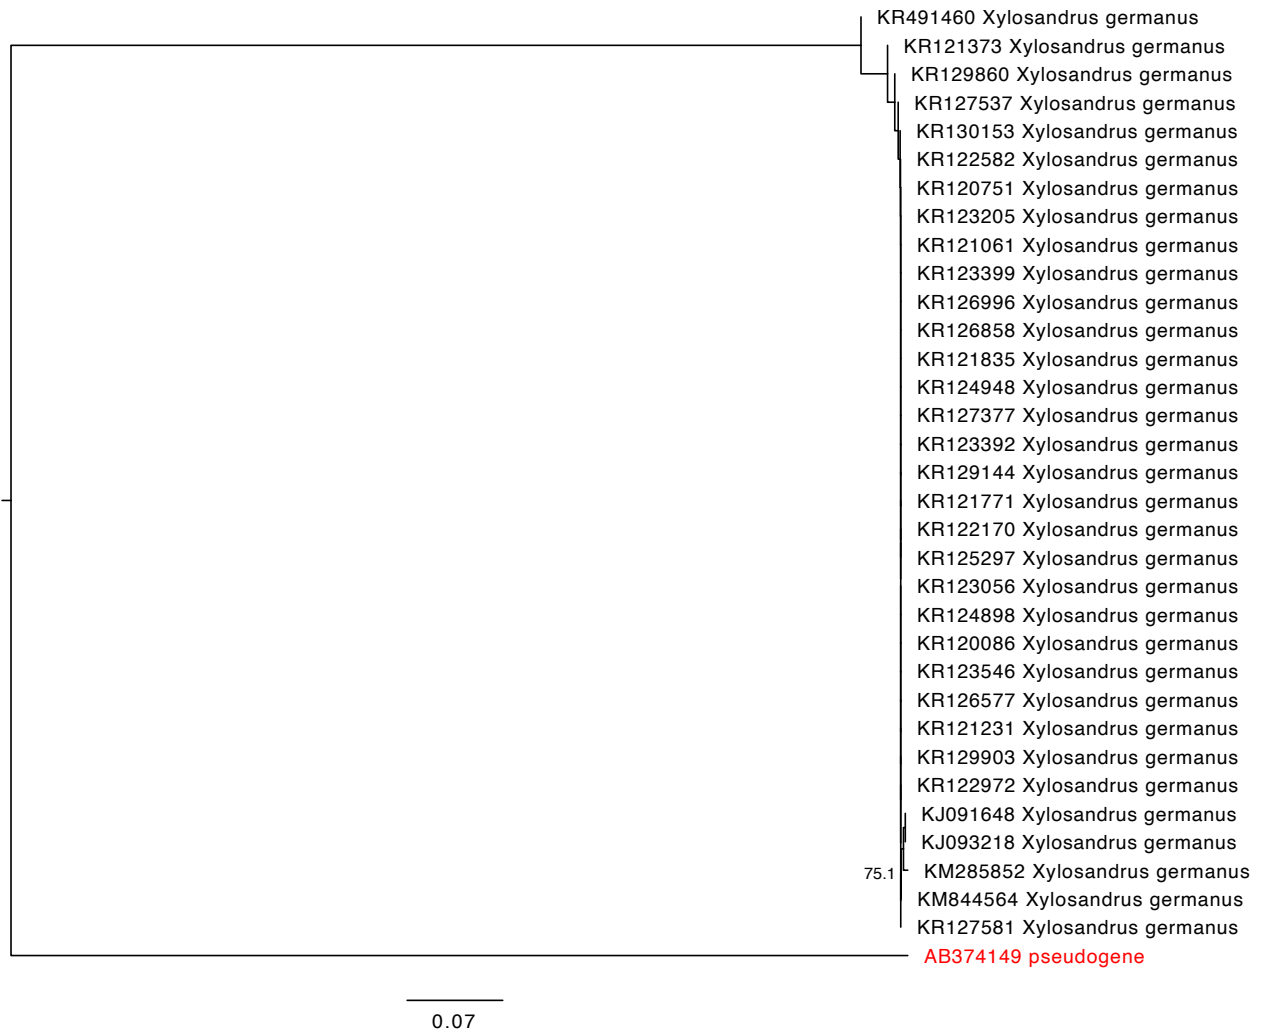



**Fig S4. A single *Triatoma dimidiata* COI pseudogene sequence is found on a long branch.** A mid-point rooted neighbor joining phylogram using the Kimura 2-parameter model of nucleotide substitution included COI gene sequences as well as a sequence annotated in GenBank as a nuclear copy of a mitochondrial gene (red). Nodes with greater than 70% bootstrap support are labelled.

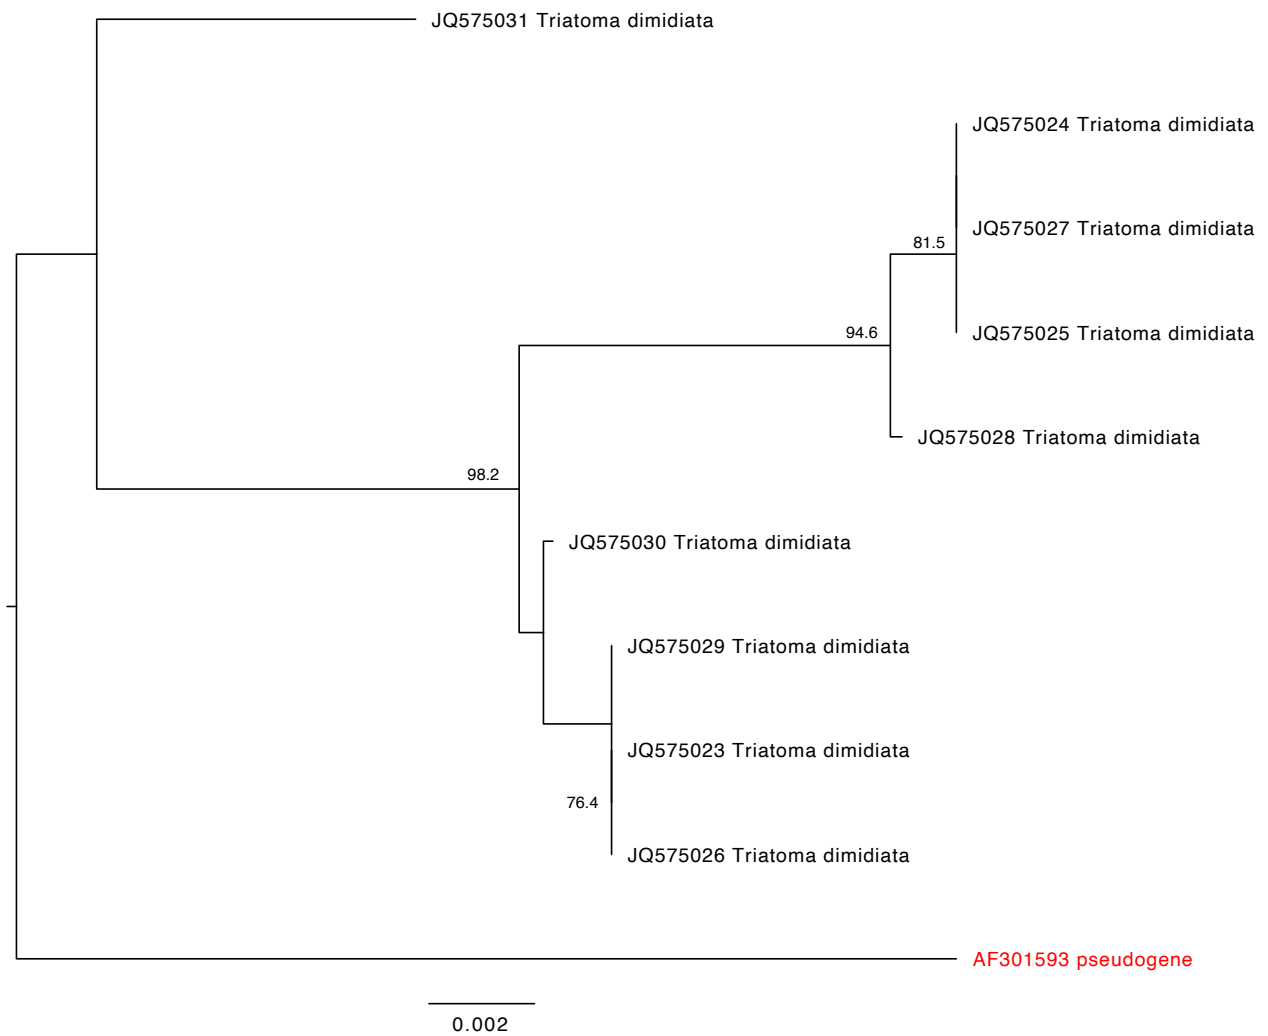



**Fig S6. *Melissotarsus insularis* COI gene and annotated pseudogene sequences are often found in intermixed clusters.** A mid-point rooted neighbor joining phylogram using the Kimura 2-parameter model of nucleotide substitution included COI gene sequences as well as sequences annotated in GenBank as a nuclear copy of a mitochondrial gene (red). Nodes with greater than 70% bootstrap support are labelled. Clusters of nearly identical sequences were collapsed.

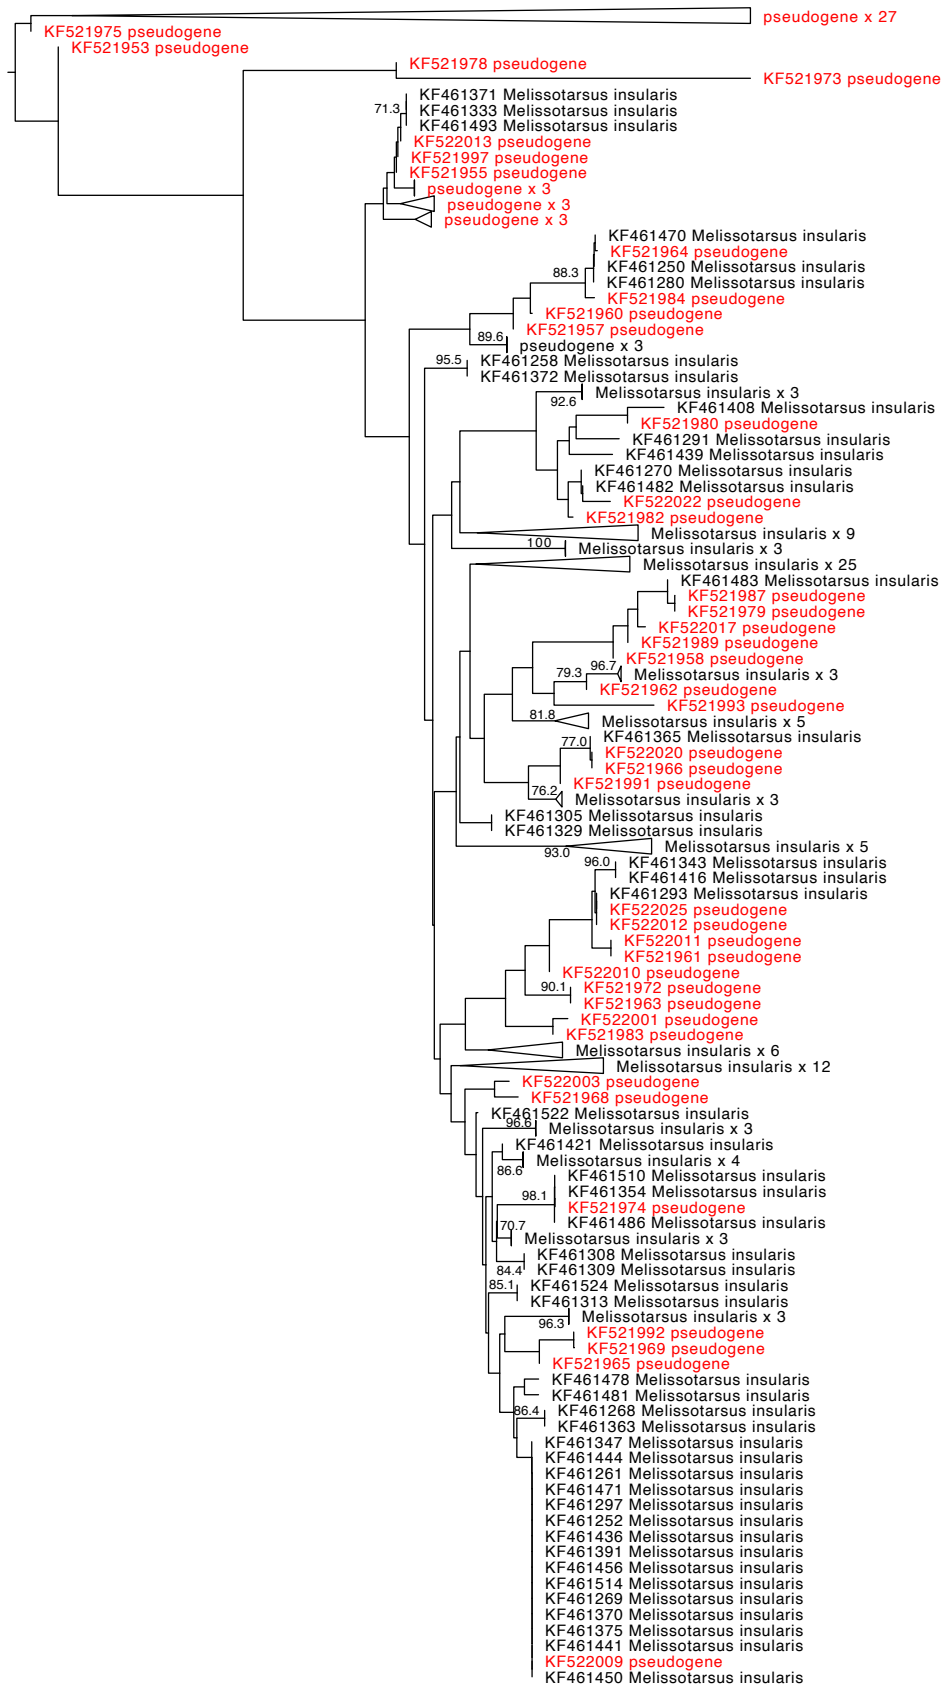

0.007

**Fig S7. A single *Lepidocyrtus cyaneus* COI pseudogene sequence clusters with other gene sequences.** A mid-point rooted neighbor joining phylogram using the Kimura 2-parameter model of nucleotide substitution included COI gene sequences as well as a sequence annotated in GenBank as a nuclear copy of a mitochondrial gene (red). Nodes with greater than 70% bootstrap support are labelled.

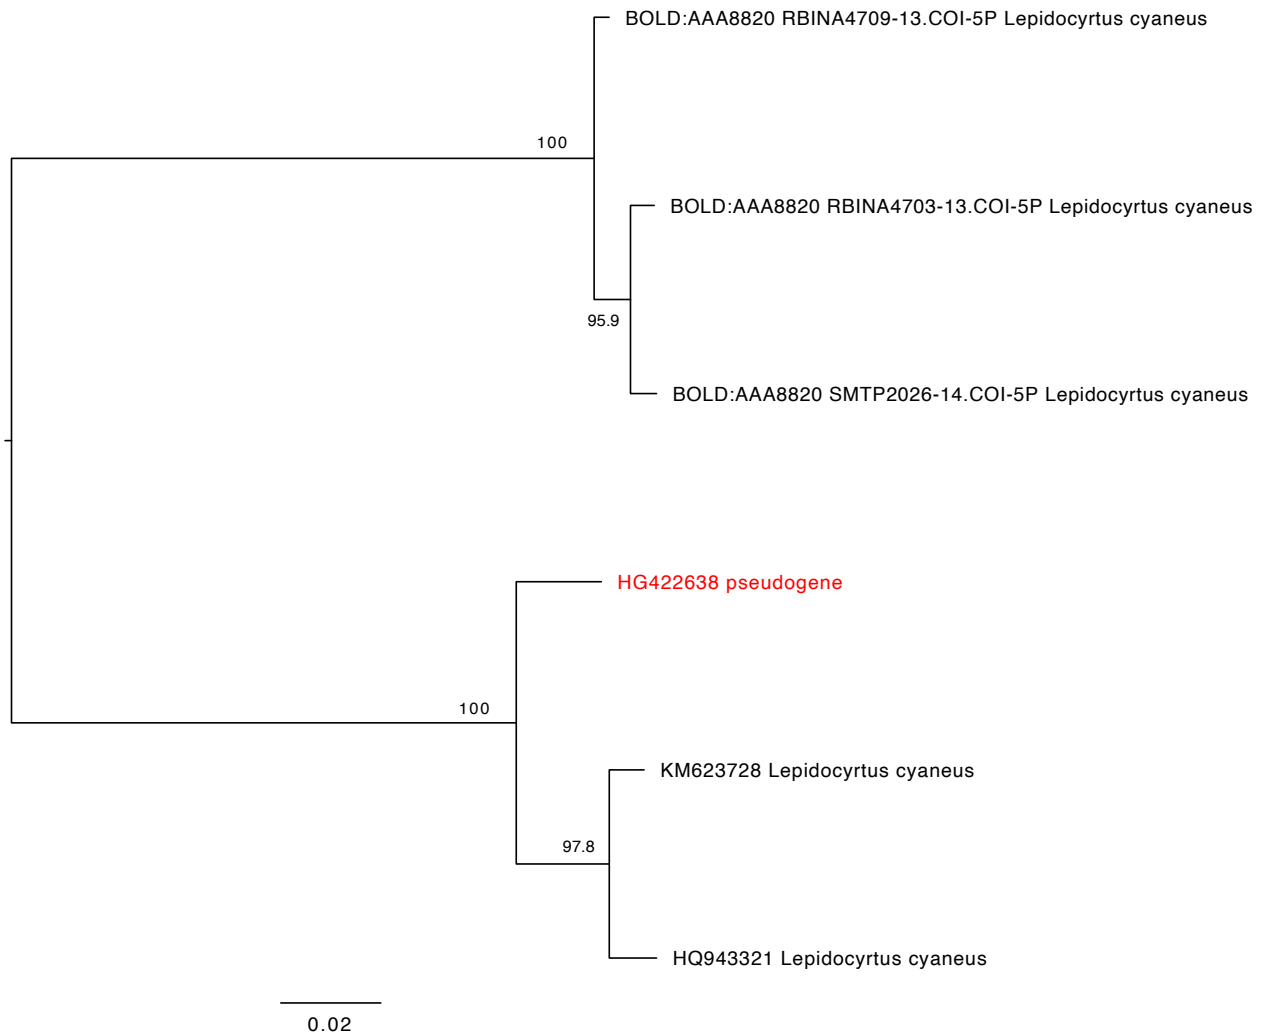

**Fig S8. Two *Halictus rubicundus* COI pseudogene sequences cluster together near other gene sequences.** A mid-point rooted neighbor joining phylogram using the Kimura 2-parameter model of nucleotide substitution included COI gene sequences as well as two sequences annotated in GenBank as a nuclear copy of a mitochondrial gene (red). Nodes with greater than 70% bootstrap support are labelled.

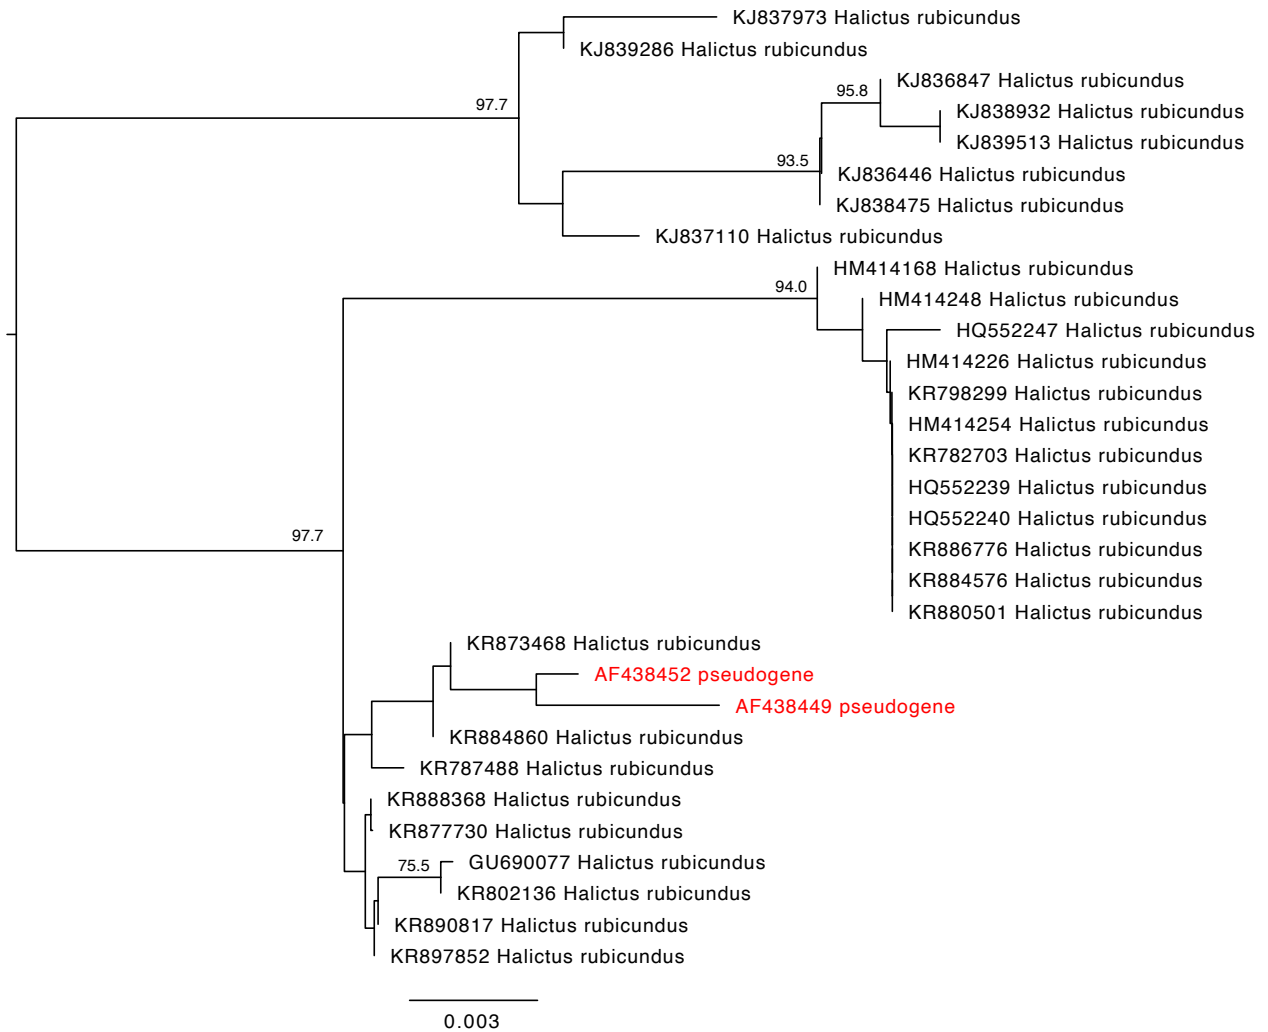

**Fig S9. Several *Goneplax rhomboides* COI pseudogene sequences cluster together.** A mid-point rooted neighbor joining phylogram using the Kimura 2-parameter model of nucleotide substitution included COI gene sequences as well as sequences annotated in GenBank as a nuclear copy of a mitochondrial gene (red). Nodes with greater than 70% bootstrap support are labelled.

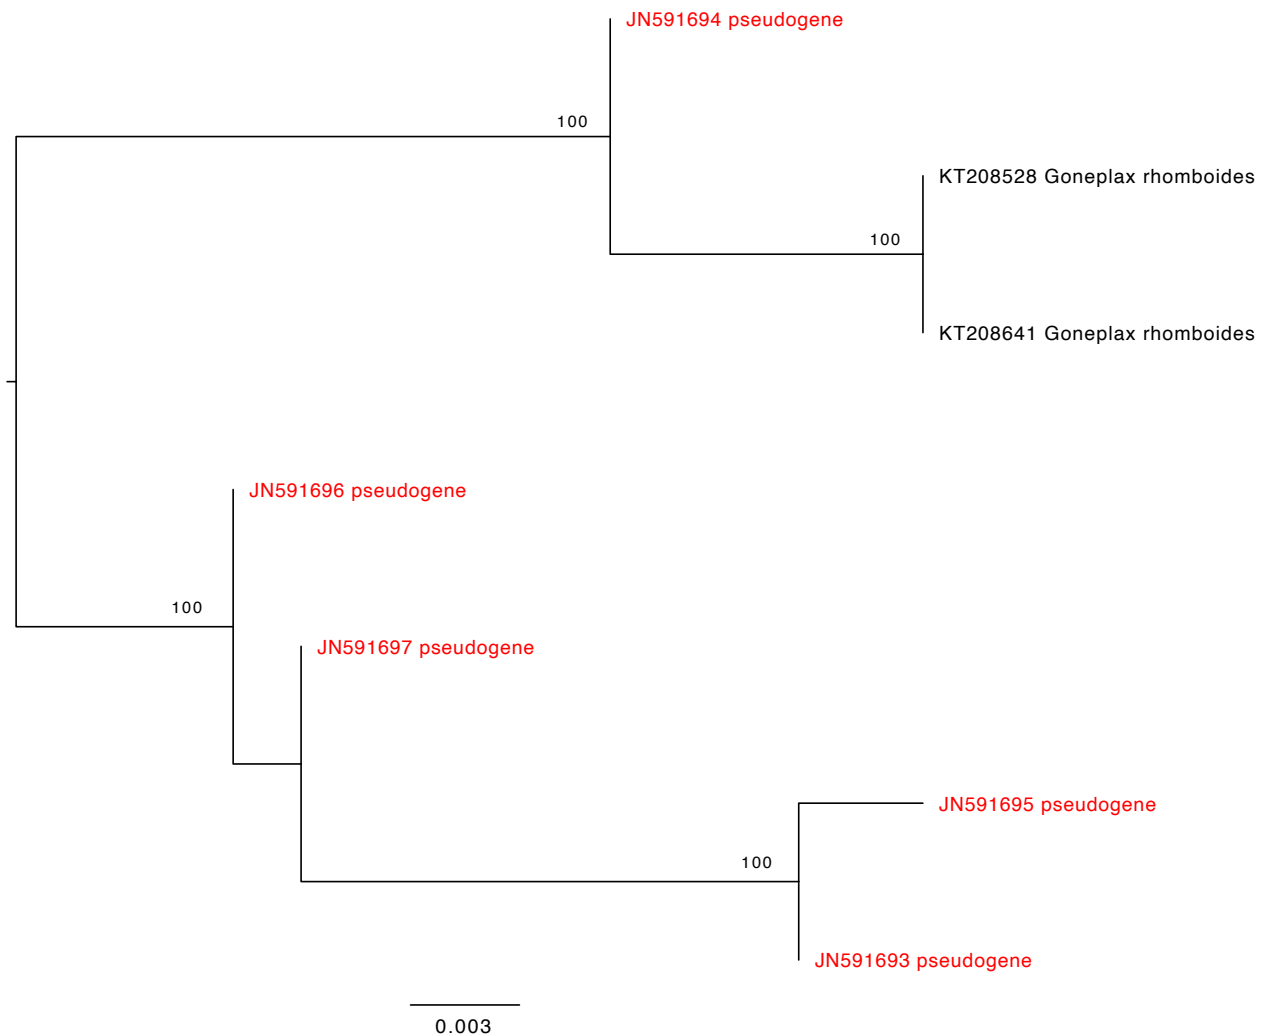

**Fig S10. A single *Ectatomma gibbum* COI pseudogene sequence is found on its own branch.** A mid-point rooted neighbor joining phylogram using the Kimura 2-parameter model of nucleotide substitution included COI gene sequences as well as a sequence annotated in GenBank as a nuclear copy of a mitochondrial gene (red). Nodes with greater than 70% bootstrap support are labelled.

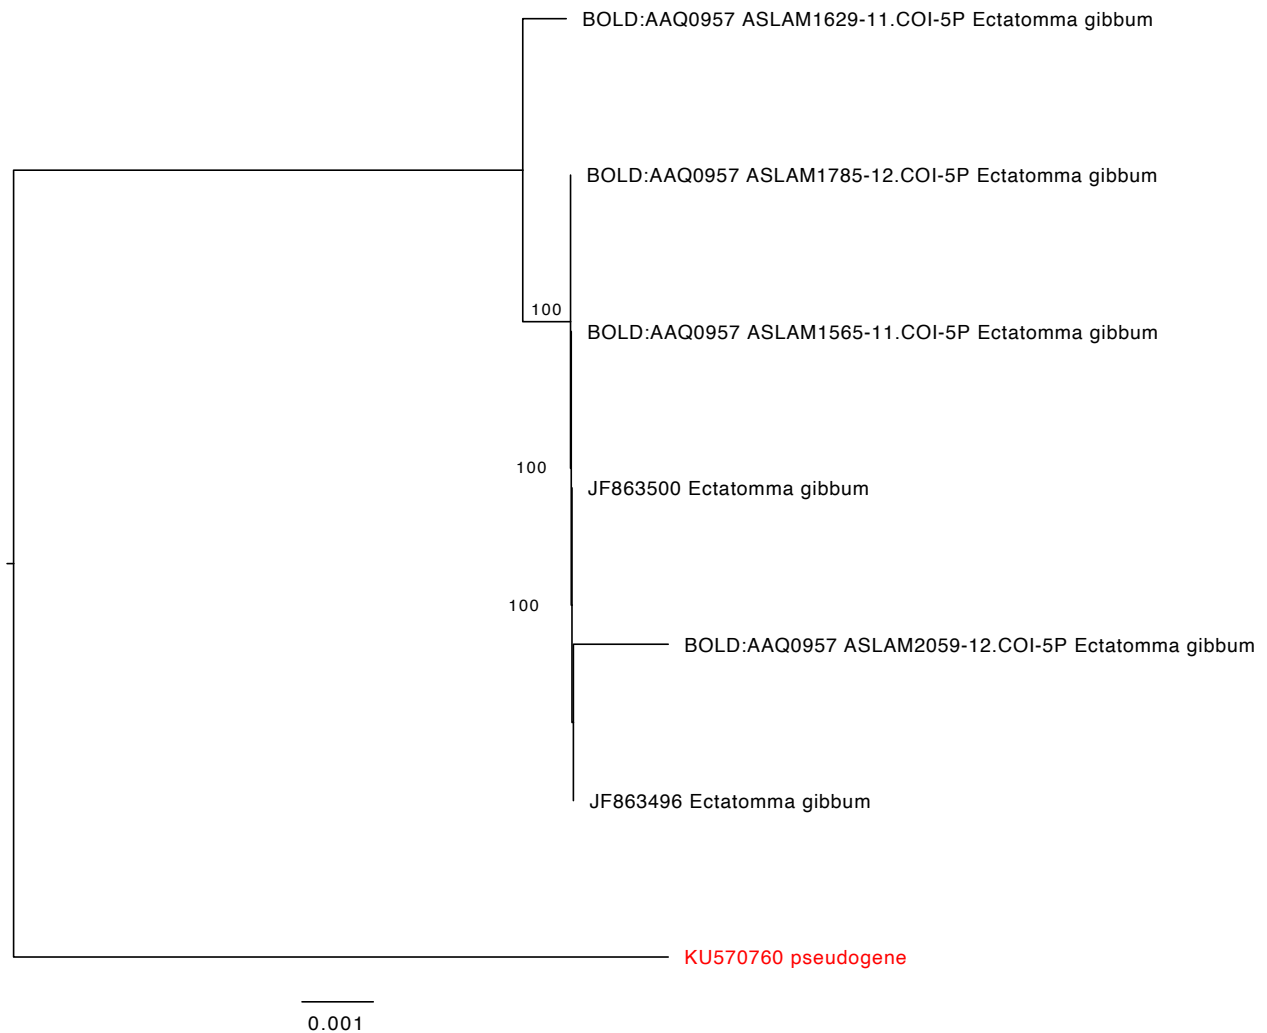



**Fig S11. *Cyphoderris monstrosa* COI gene and annotated pseudogene sequences sometimes cluster with regular gene sequences.** A mid-point rooted neighbor joining phylogram using the Kimura 2-parameter model of nucleotide substitution included COI gene sequences as well sequences annotated in GenBank as a nuclear copy of a mitochondrial gene (red). Nodes with greater than 70% bootstrap support are labelled.

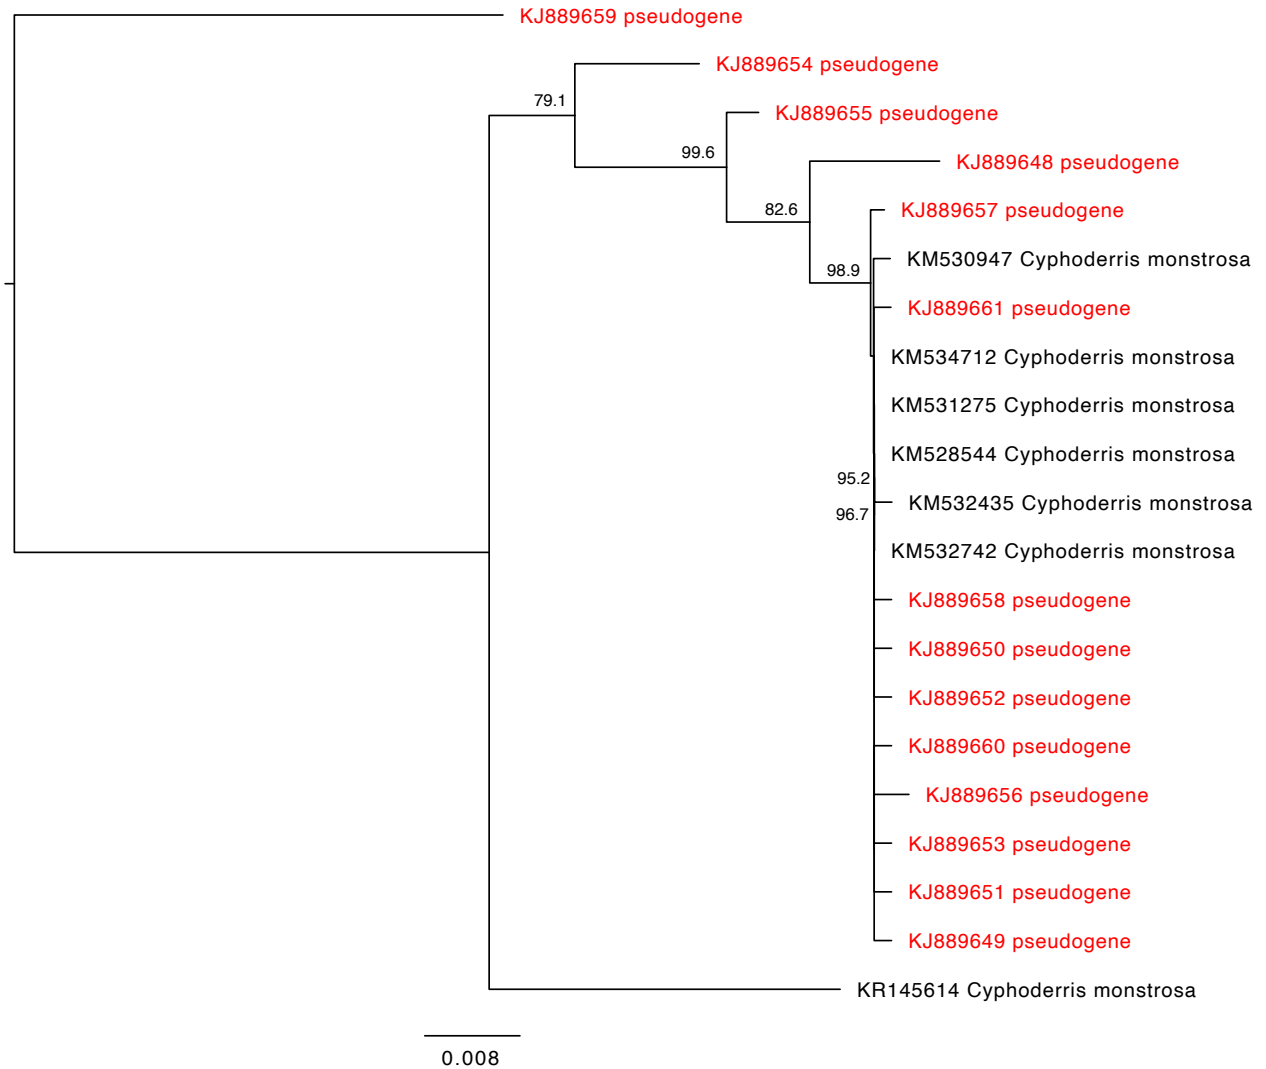

**Fig S12. Sensitivity and specificity were used to assess the effectiveness of our two pseudogene filtering approaches.** The vertical dashed line represents a threshold used to delimit nuMT sequences. The ability to detect pseudogenes represents the positive condition. Correctly removed nuMTs are true positives (TP). Incorrectly filtered COI gene sequences (genes) represents false positives (FP). Correctly retained genes represents true negatives (TN). Incorrectly retained nuMTs represents false negatives (FN).

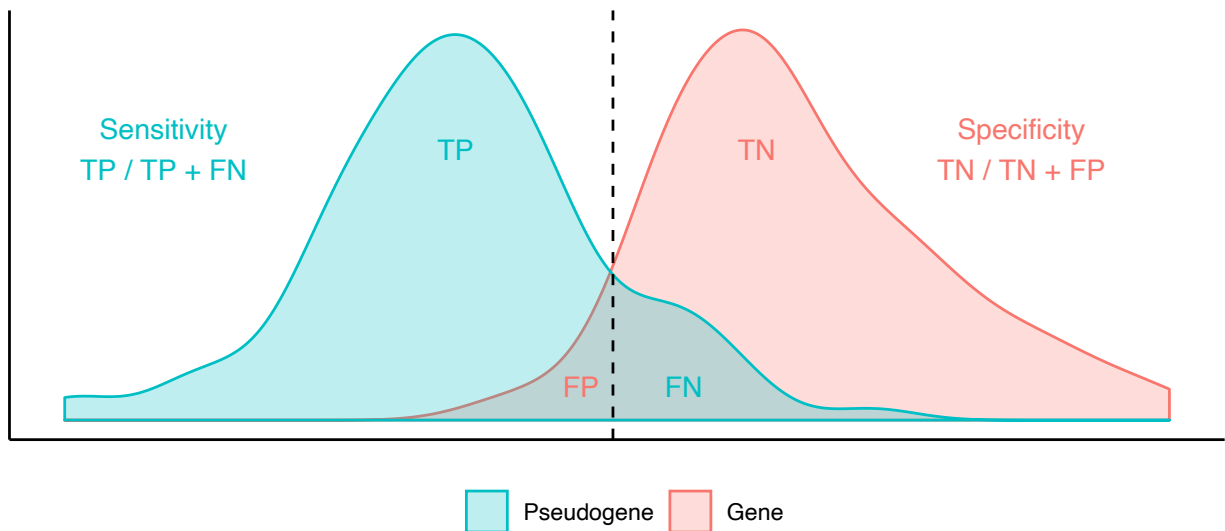

**Fig S13. Halving COI sequence lengths results in fewer pseudogenes removed compared with full length COI barcode sequences.** Each column shows the results from a particular simulation: a controlled community with nuMTs absent, a community with simulated nuMTs with a reduced GC content, and a community with simulated nuMTs with frameshift mutations (introduced indels). The top two panels show the length variation of sequences in the longest retained open reading frame for short sequences sampled from the 5' and 3' end of COI barcode sequences. The solid vertical line indicates half the length of a typical COI barcode at 329 bp. The two vertical dashed lines shows the boundaries for identifying ORFs with outlier lengths. The bottom two panels show the nucleotide bit score for short sequences sampled from the 5' and 3' ends of COI barcode sequences. The dashed vertical line shows the boundary for identifying sequences with unusually short scores.

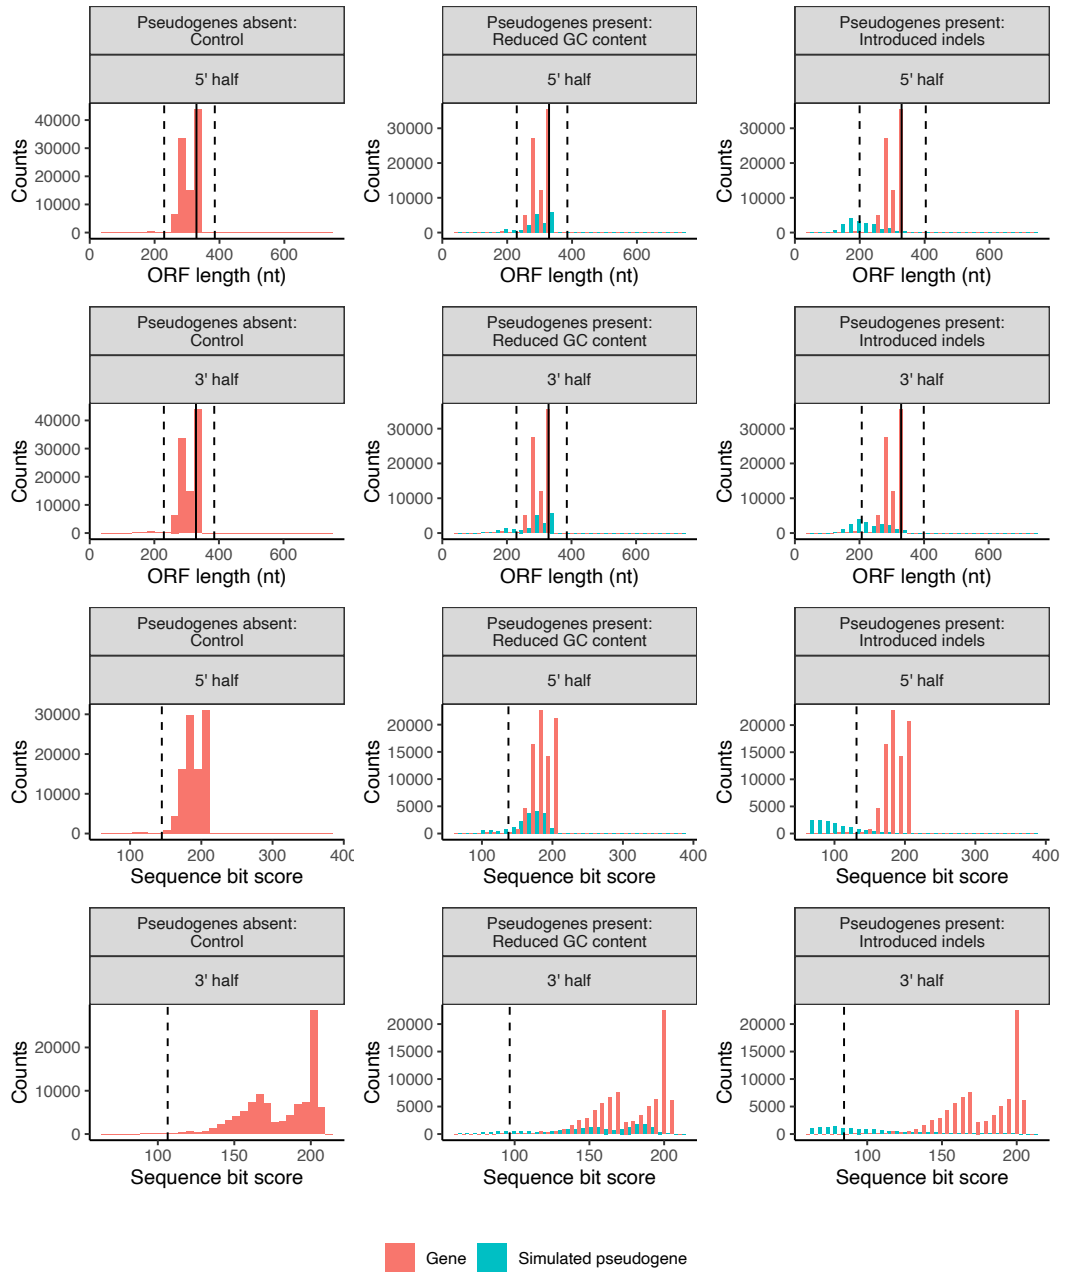

**Fig S14. Doubling the proportion of mutated sequences greatly reduces the number of pseudogenes removed.** Each column shows the results from a particular simulation: a controlled community with nuMTs absent, a community with nuMTs that have a reduced GC content, and a community with nuMTs with frameshift mutations (introduced indels). The top panel shows the length variation of sequences in the longest retained open reading frame. The solid vertical line indicates the length of a typical COI barcode at 658 bp. The two vertical dashed lines shows the boundaries for identifying ORFs with outlier lengths. The bottom panel shows the sequence bit score variation. The vertical dashed line shows the boundary for identifying sequences with small outlier scores.

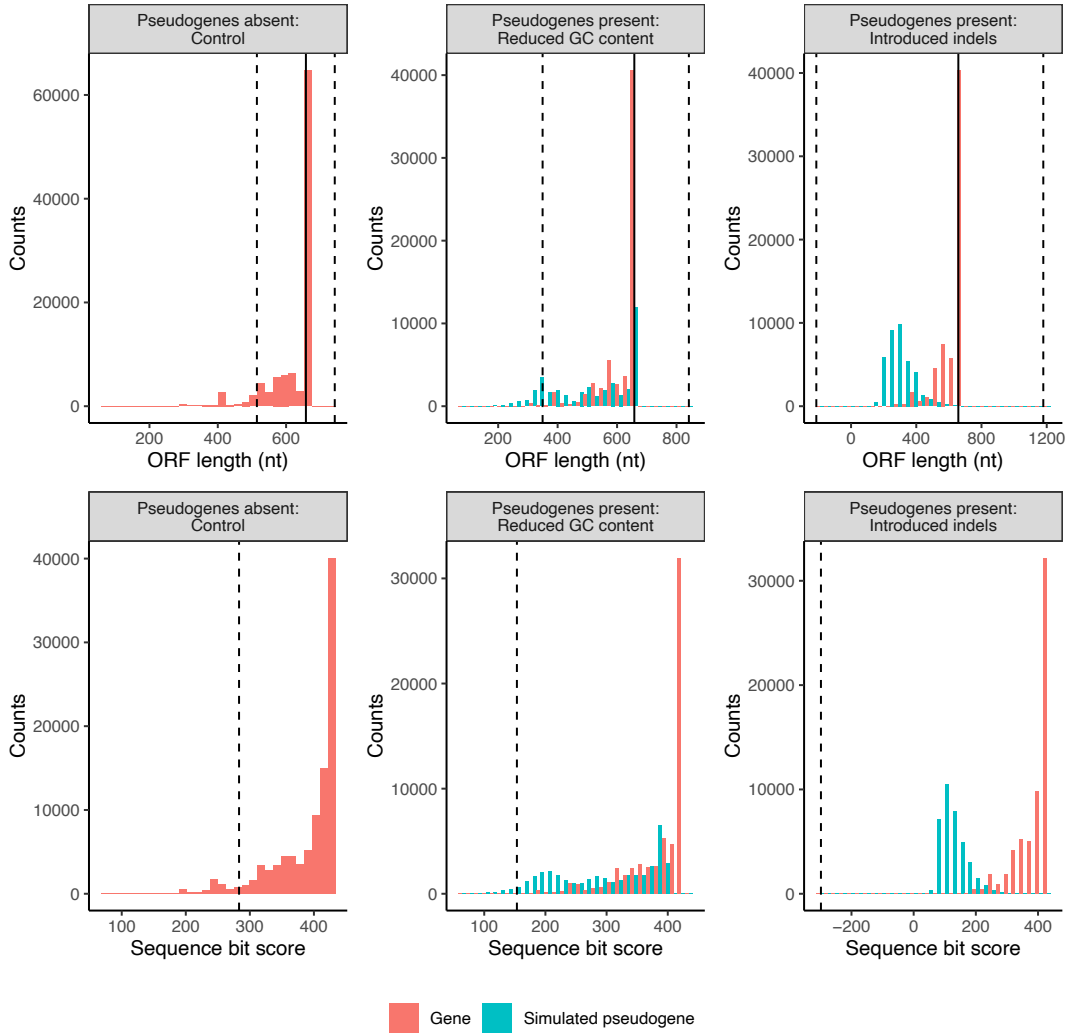

**Fig S15. Halving the proportion of mutated sequences increases the number of pseudogenes removed.** Each column shows the results from a particular simulation: a controlled community with nuMTs absent, a community with nuMTs that have a reduced GC content, and a community with nuMTs with frameshift mutations (introduced indels). The top panel shows the length variation of sequences in the longest retained open reading frame. The solid vertical line indicates the length of a typical COI barcode at 658 bp. The two vertical dashed lines shows the boundaries for identifying ORFs with outlier lengths. The bottom panel shows the sequence bit score variation. The vertical dashed line shows the boundaries for identifying sequences with short outliers scores.

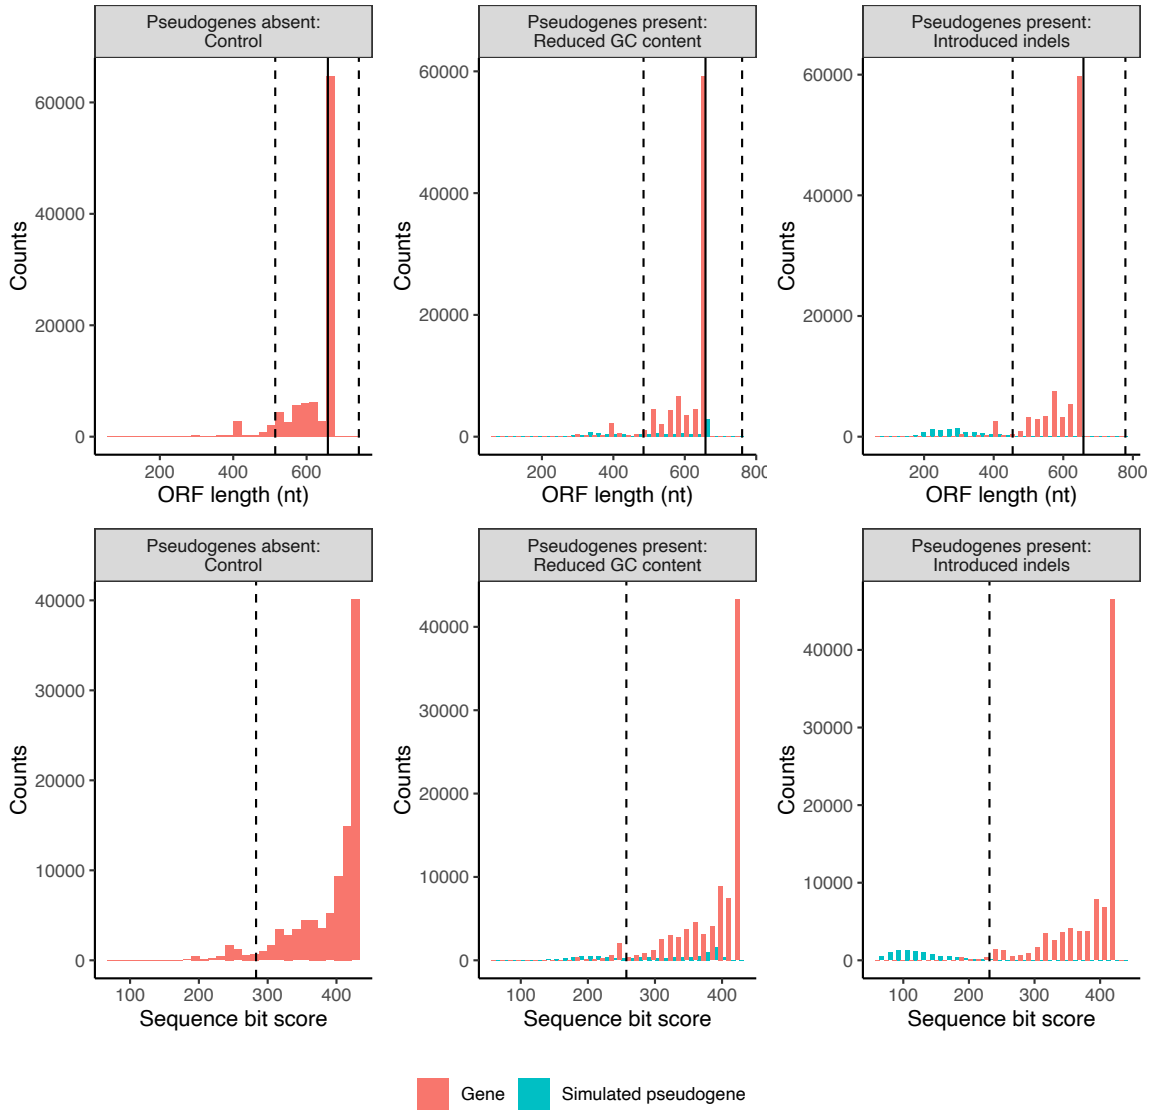



## References

- Elbrecht, V., & Leese, F. (2017). Validation and Development of COI Metabarcoding Primers for Freshwater Macroinvertebrate Bioassessment. *Frontiers in Environmental Science*, 5, 11. doi: 10.3389/fenvs.2017.00011
- Folmer, O., Black, M., Hoeh, W., Lutz, R., & Vrijenhoek, R. (1994). DNA primers for amplification of mitochondrial cytochrome c oxidase subunit I from diverse metazoan invertebrates. *Molecular Marine Biology and Biotechnology*, 3(5), 294–299.
- Geller, J., Meyer, C., Parker, M., & Hawk, H. (2013). Redesign of PCR primers for mitochondrial cytochrome c oxidase subunit I for marine invertebrates and application in all-taxa biotic surveys. *Molecular Ecology Resources*, 13(5), 851–861. doi: 10.1111/1755-0998.12138
- Gibson, J., Shokralla, S., Curry, C., Baird, D. J., Monk, W. A., King, I., & Hajibabaei, M. (2015). Large-Scale Biomonitoring of Remote and Threatened Ecosystems via High-Throughput Sequencing. *PLOS ONE*, 10(10), e0138432. doi: 10.1371/journal.pone.0138432
- Gibson, J., Shokralla, S., Porter, T. M., King, I., Konynenburg, S. van, Janzen, D. H., ... Hajibabaei, M. (2014). Simultaneous assessment of the macrobiome and microbiome in a bulk sample of tropical arthropods through DNA metasytematics. *Proceedings of the National Academy of Sciences*, 111(22), 8007–8012. doi: 10.1073/pnas.1406468111

- Hajibabaei, M., Spall, J. L., Shokralla, S., & van Konynenburg, S. (2012). Assessing biodiversity of a freshwater benthic macroinvertebrate community through non-destructive environmental barcoding of DNA from preservative ethanol. *BMC Ecology*, *12*, 28. doi: 10.1186/1472-6785-12-28
- Leray, M., Yang, J. Y., Meyer, C. P., Mills, S. C., Agudelo, N., Ranwez, V., ... Machida, R. J. (2013). A new versatile primer set targeting a short fragment of the mitochondrial COI region for metabarcoding metazoan diversity: Application for characterizing coral reef fish gut contents. *Frontiers in Zoology*, *10*(1), 34. doi: 10.1186/1742-9994-10-34
- Vamos, E., Elbrecht, V., & Leese, F. (2017). Short COI markers for freshwater macroinvertebrate metabarcoding. *Metabarcoding and Metagenomics*, *1*, e14625. doi: 10.3897/mbmg.1.14625
